# Supplementary material
Source: PubMed Central journal article supplement (PMC5636683)
Supplement: NIHMS908258-supplement-Supporting_Information.pdf [file NIHMS908258-supplement-Supporting_Information.pdf]

## Electronic Supplementary Information

### 8-Oxo-7,8-dihydro-2'-deoxyguanosine and abasic site tandem lesions are oxidation prone yielding hydantoin products that strongly destabilize duplex DNA

Aaron M. Fleming and Cynthia J. Burrows\*

Department of Chemistry, University of Utah

315 S 1400 East, Salt Lake City, UT 84112-0850, USA

\*Corresponding author. E-mail address: [burrows@chem.utah.edu](mailto:burrows@chem.utah.edu)

| <b>Item</b>                                                                                     | <b>Page</b> |
|-------------------------------------------------------------------------------------------------|-------------|
| <b>Figure 1.</b> Method to determine dOG oxidation products in dsODNs                           | S2          |
| <b>Figure 2.</b> Products observed with F in the complementary strand to dOG (O)                | S3          |
| <b>Figure 3.</b> Ratios of the dSp diastereomers with F in the complementary strand to dOG (O)  | S4          |
| <b>Figure 4.</b> Method to measure the context dependency in the relative reactivity of dOG (O) | S5          |
| <b>Figure 5.</b> Example HPLC traces showing purity of a ssODN with OG, dGh, or the dSp isomers | S6          |

**Figure 1.** Method to determine dOG oxidation products in dsODNs

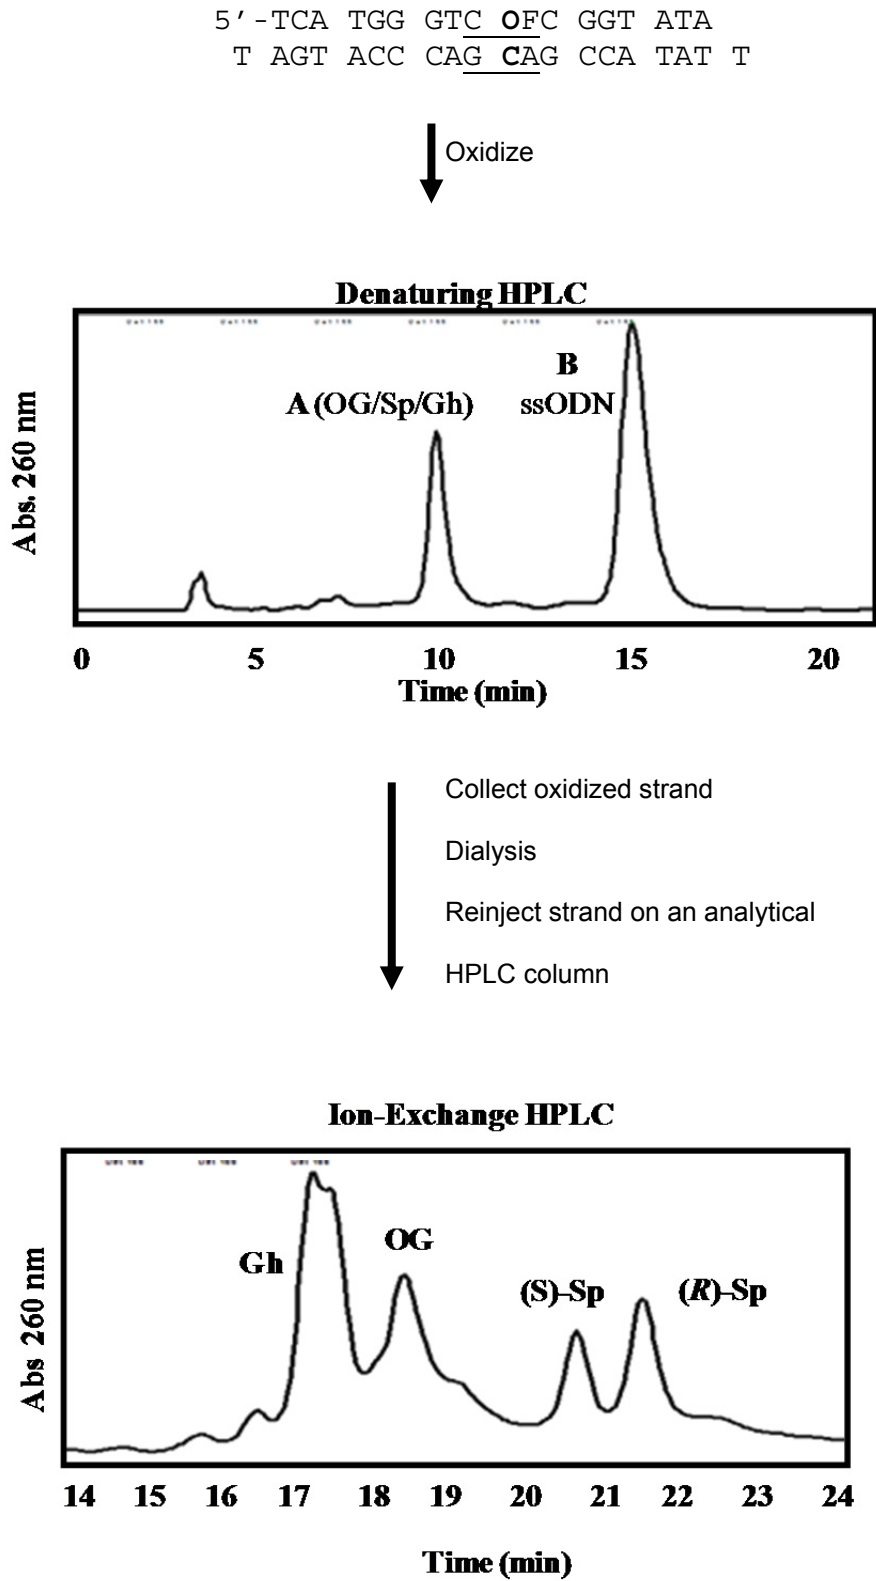

**Figure 2.** Products observed with F in the complementary strand to dOG (O)

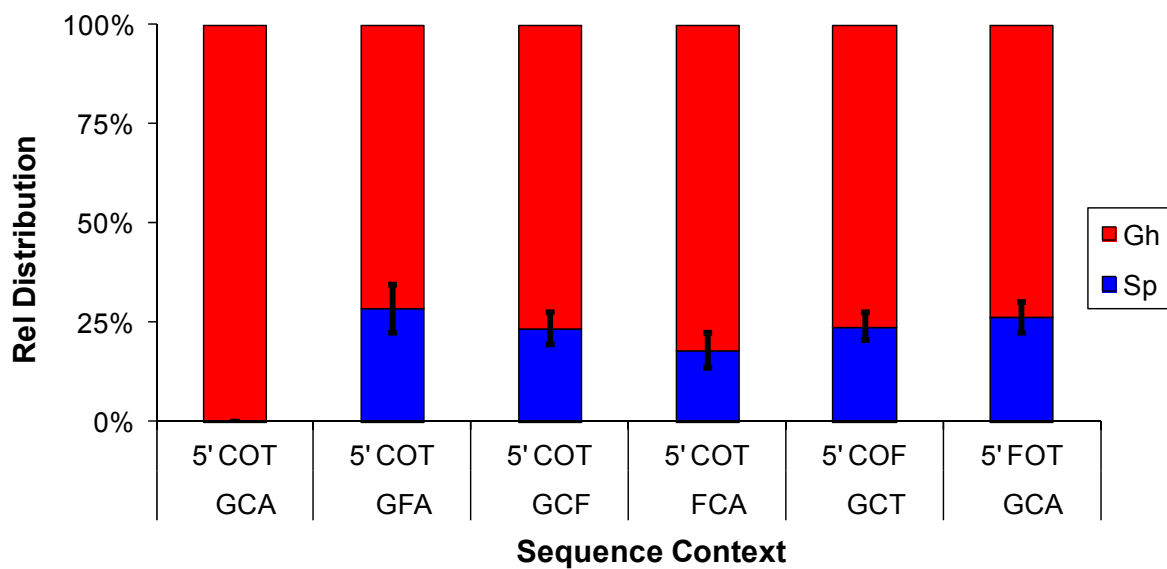

**Figure 3.** Ratios of the dSp diastereomers with F in the complementary strand to dOG (O)

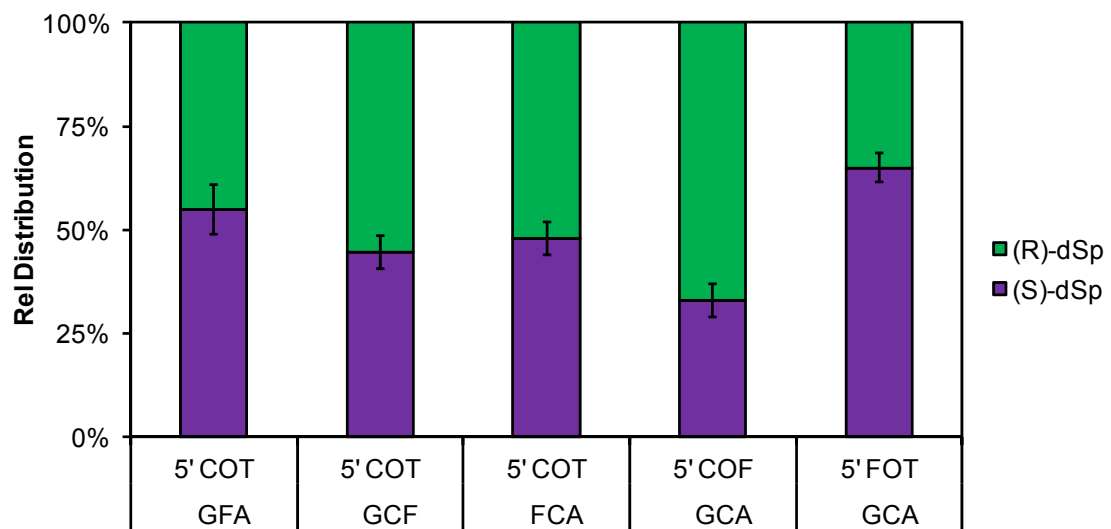

**Figure 4.** Method to measure the context dependency in the relative reactivity of dOG (O)

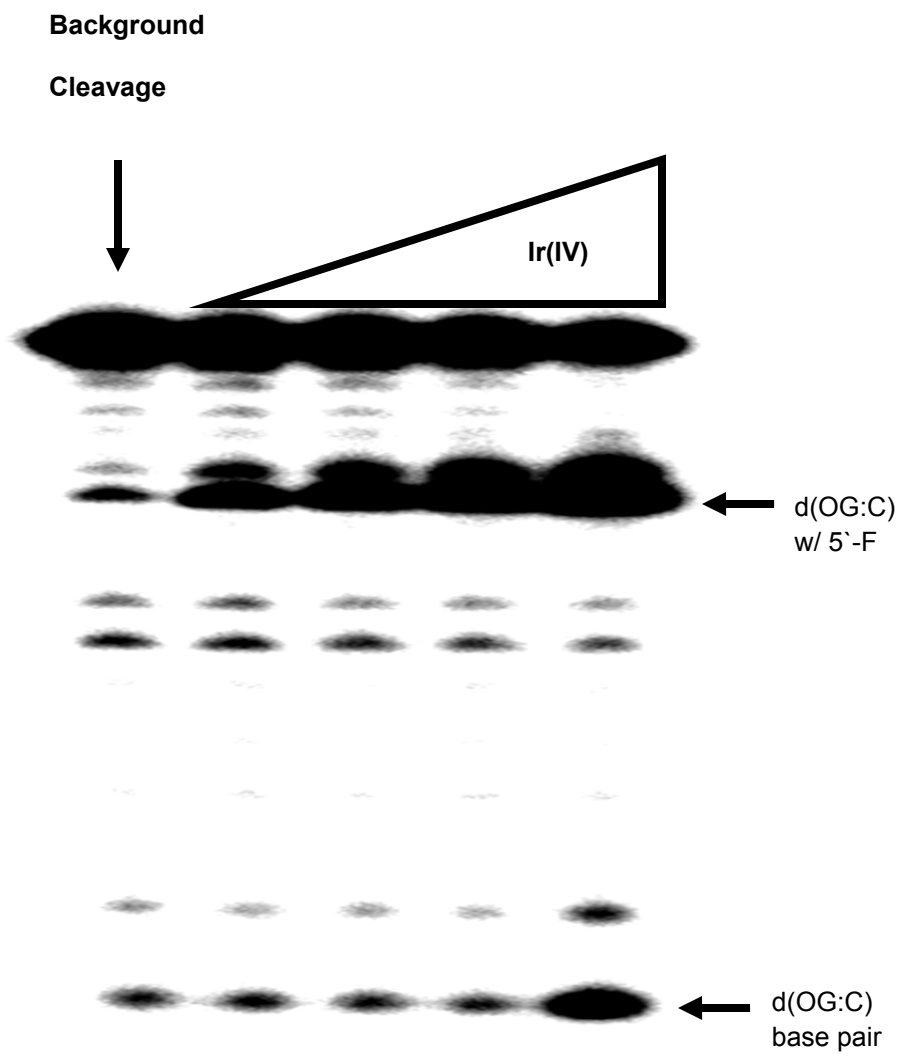

5'-TTG AGC COT CAG ATG TFO TCG CTG  
 AAC TCG GCA GTC TAC AGC AGC GAC

**Figure 5.** Example HPLC traces showing purity of a ssODN with dOG, dGh, or the dSp isomers

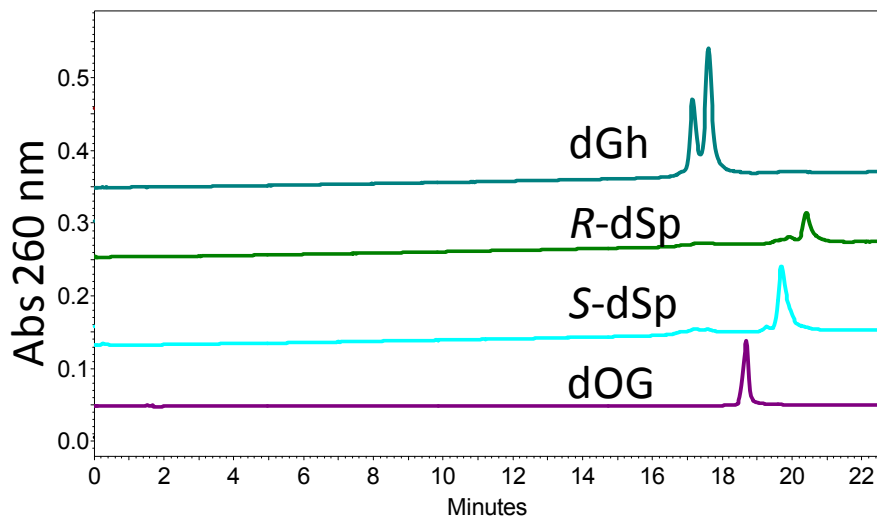

The traces are for the sequence 5'- TC ATG GGT FX T CGG TAT A-3' where X = dOG, dGh, (S)-dSp, or (R)-dSp.

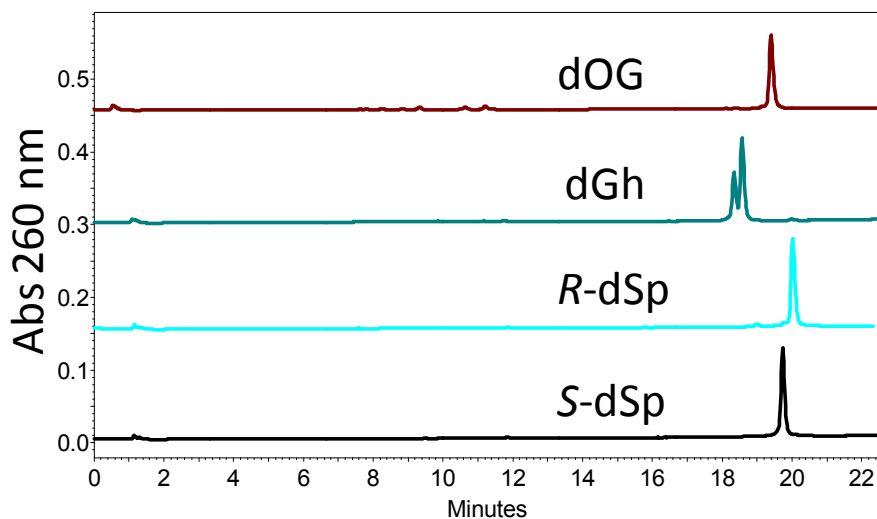

The traces are for the sequence 5'- TC ATG GGT CX F CGG TAT A-3' where X = dOG, dGh, (S)-dSp, or (R)-dSp.
